# Supplementary material for: Parrotfish predation drives distinct microbial communities in reef-building corals
Source: Anim Microbiome. 2020 Feb 10;2:5. doi: 10.1186/s42523-020-0024-0 (PMC7807759; doi:10.1186/s42523-020-0024-0)
Supplement: Supplementary file 1 — Additional file 1: Table S1. Results of the permutational ANOVA on the bacterial assemblages according to the sample type (control, predated coral and fish mouth) assessed at Ti and Tf for the mesocosm experiment. Table S2. Results of pair-wise tests on the effect of the sample type on the bacterial assemblages for the mesocosm experiment at Ti and Tf. Table S3. Average relative abundance of the families present in the fish mouths for the mesocosm experiment. Table S4. Average relative abundance of the families present in mechanically wounded corals at Ti for the mesocosm experiment. Table S5. Average relative abundance of the families present in mechanically wounded corals at Tf. Table S6. Average relative abundance of the families present in the predated corals at Ti for the mesocosm experiment. Table S7. Average relative abundance of families present in predated corals at Tf. Table S8. Results of the permutational ANOVA on the bacterial assemblages according to the sample type assessed for field experiment including or not water samples. Table S9. Results of pair-wise tests on the effect of the sample type on the bacterial assemblages for the field experiment. Table S10. Average relative abundance of the families present in the fish mouths for the field experiment. Table S11. Average relative abundance of the families present in naturally unbitten corals in the field. Table S12. Average relative abundance of families present in bitten corals for the field experiment. Table S13. Results of ANOVA and non-parametric tests of the effect of the sample type on alpha diversity metrics (Observed Richness and Shannon-Wiener Index) for the mesocosm experiment at Ti and Tf. Table S14. Results of posthoc tests assessing the effect of the sample type on alpha diversity metrics (Observed Richness and Shannon-Wiener index) for the mesocosm experiment at Ti and Tf. Table S15. Results of ANOVA and non-parametric tests on the effect of the type of sample on alpha diversity metrics [file 42523_2020_24_MOESM1_ESM.xlsx]

## Sheet: Title
Parrotfish predation drives distinct microbial communities in reef-building corals
Leïla Ezzat1*, Thomas Lamy1, Rebecca L. Maher2, Katrina S. Munsterman1, Kaitlyn M. Landfield1, Emily R. Schmeltzer2, Cody S. Clements3, Rebecca Vega Thurber2 and Deron E. Burkepile1,4
1Department of Ecology, Evolution and Marine Biology, University of California Santa Barbara, Santa Barbara, CA 93106, USA
2Department of Microbiology, Oregon State University, Corvallis, OR, USA
3School of Biological Sciences and Aquatic Chemical Ecology Center, Georgia Institute of Technology, Atlanta, GA, USA
4Marine Science Institute, University of California Santa Barbara, Santa Barbara, CA, USA

## Sheet: TableS1
Table S1. Results of the permutational ANOVA on the bacterial assemblages according to the sample type (control, predated coral and fish mouth) assessed at Ti and Tf for the mesocosm experiment.
PERMANOVA (Ti)
	Df	SumsOfSqs	MeanSqs	F.Model	R2	Pr(>F)
SampleType	2	2.5071	1.25354	4.5349	0.39315	0.001
Residuals	14	3.8699	0.27642	0.60685
Total	16	6.377	1
			PERMANOVA (Tf)
	Df	SumsOfSqs	MeanSqs	F.Model	R2	Pr(>F)
SampleType	2	2.1025	1.05123	4.0459	0.40274	0.001
Residuals	12	3.1179	0.25983		0.59726
Total	14	5.2204	1

## Sheet: TableS2
Table S2. Results of pair-wise tests on the effect of the sample type on the bacterial assemblages for the mesocosm experiment at Ti and Tf.
Pair-wise Adonis Ti
	F.Model	R2	p.value	p.adjusted
Fish - Predated coral	4.34807	0.265968	0.001	0.003
Fish - Control	8.35552	0.510868	0.014	0.021
Predated coral - Control	2.47682	0.236409	0.069	0.069
Pair-wise Adonis (Tf)
	F.Model	R2	p.value	p.adjusted
Fish - Predated coral	4.98426	0.323497	0.004	0.012
Fish - Control	4.78191	0.367797	0.012	0.012
Predated coral - Control	2.30097	0.277193	0.016	0.016

## Sheet: TableS3
Table S3. Average relative abundance of the families present in the fish mouths for the mesocosm experiment
Family	Colonne1	Average Relative abundance
Flavobacteriaceae	58	0.231604
Alteromonadaceae	23	0.153541
Unassigned family	162	0.112528
Pseudoalteromonadaceae	11	0.0837498
Rhodobacteraceae	91	0.0584181
Vibrionaceae	11	0.0508358
Hahellaceae	4	0.0284336
Moraxellaceae	10	0.0275719
Lentisphaeraceae	4	0.0273996
Oceanospirillaceae	22	0.0237808
Paenibacillaceae	3	0.0122351
Erythrobacteraceae	6	0.0117181
Colwelliaceae	11	0.0115458
Saprospiraceae	12	0.00999483
Idiomarinaceae	6	0.00965018
Cryomorphaceae	11	0.00930553
[Chromatiaceae]	3	0.00913321
Verrucomicrobiaceae	8	0.00844391
Halomonadaceae	8	0.00689299
Rhodospirillaceae	4	0.00603136
Flammeovirgaceae	15	0.00585904
Synechococcaceae	3	0.00551439
Oleiphilaceae	4	0.00534206
Corynebacteriaceae	5	0.00516974
Xanthomonadaceae	2	0.00499742
Pelagibacteraceae	3	0.00430812
Francisellaceae	5	0.00379114
Sphingomonadaceae	1	0.00379114
Saccharospirillaceae	2	0.00344649
Marine	1	0.00327417
OM60	9	0.00310184
Hyphomicrobiaceae	13	0.00292952
Oxalobacteraceae	2	0.00292952
Micrococcaceae	3	0.00275719
Pirellulaceae	9	0.00275719
Desulfobacteraceae	3	0.00258487
Hyphomonadaceae	9	0.00258487
RFP12	4	0.00241255
mitochondria	5	0.00224022
Pseudomonadaceae	5	0.00224022
Phyllobacteriaceae	9	0.0020679
Piscirickettsiaceae	10	0.0020679
Planctomycetaceae	3	0.0020679
Pasteurellaceae	2	0.00155092
Bacillaceae	3	0.0013786
Nocardioidaceae	1	0.0013786
Pseudanabaenaceae	5	0.0013786
Alcaligenaceae	1	0.00120627
Campylobacteraceae	4	0.00120627
Fusobacteriaceae	1	0.00120627
Bacteriovoracaceae	6	0.00103395
Dermacoccaceae	1	0.00103395
HTCC2188	4	0.00103395
Rhodothermaceae	3	0.00103395
Salinisphaeraceae	2	0.00103395
Shewanellaceae	2	0.00103395
Xenococcaceae	3	0.00103395
[Balneolaceae]	1	0.000861623
A714017	1	0.000861623
A4b	1	0.000861623
Ellin6075	1	0.000861623
Coxiellaceae	2	0.000689299
NB1-i	1	0.000689299
Porphyromonadaceae	1	0.000689299
[Mogibacteriaceae]	1	0.000516974
[Paraprevotellaceae]	1	0.000516974
Ardenscatenaceae	2	0.000516974
Erysipelotrichaceae	1	0.000516974
Gemmataceae	1	0.000516974
[Exiguobacteraceae]	1	0.000344649
Cenarchaeaceae	5	0.000344649
Comamonadaceae	1	0.000344649
Desulfobulbaceae	3	0.000344649
Enterobacteriaceae	1	0.000344649
JTB38	1	0.000344649
Methylophilaceae	1	0.000344649
NS9	1	0.000344649
Turicibacteraceae	1	0.000344649
[Marinicellaceae]	10	0.000172325
Carnobacteriaceae	1	0.000172325
Cohaesibacteraceae	3	0.000172325
Eubacteriaceae	1	0.000172325
Nitrospiraceae	1	0.000172325
OCS155	1	0.000172325
Sphaerochaetaceae	1	0.000172325

## Sheet: TableS4
Table S4. Average relative abundance of the families present in mechanically wounded corals at Ti for the mesocosm experiment
Family	Average relative abundance
Hahellaceae	0.839164
Unassigned family	0.133092
Synechococcaceae	0.00402091
Rhodobacteraceae	0.00321673
Alteromonadaceae	0.00281464
Neisseriaceae	0.00241255
Pseudoalteromonadaceae	0.00241255
Rhodospirillaceae	0.00241255
Paenibacillaceae	0.00160836
Pasteurellaceae	0.00160836
Sphingomonadaceae	0.00160836
Colwelliaceae	0.00120627
Oceanospirillaceae	0.00120627
Moraxellaceae	0.000804182
Xanthomonadaceae	0.000804182
Erythrobacteraceae	0.000402091
Francisellaceae	0.000402091
Kiloniellaceae	0.000402091
Methylobacteriaceae	0.000402091

## Sheet: TableS5
Table S5. Average relative abundance of the families present in mechanically wounded corals at Tf
Family	Average relative abundance
Hahellaceae	0.599115
Unassigned family	0.313229
Rhodobacteraceae	0.0233213
Pseudoalteromonadaceae	0.0124648
Alteromonadaceae	0.008846
Flavobacteriaceae	0.00763973
Colwelliaceae	0.00603136
Oceanospirillaceae	0.004423
Verrucomicrobiaceae	0.00402091
Vibrionaceae	0.00361882
Paenibacillaceae	0.00241255
Phyllobacteriaceae	0.00160836
[Amoebophilaceae]	0.00120627
[Marinicellaceae]	0.00120627
Francisellaceae	0.00120627
Moraxellaceae	0.00120627
Cenarchaeaceae	0.000804182
Halomonadaceae	0.000804182
OM60	0.000804182
Sphingomonadaceae	0.000804182
Synechococcaceae	0.000804182
Bacillaceae	0.000402091
Erythrobacteraceae	0.000402091
Hyphomonadaceae	0.000402091
Lentisphaeraceae	0.000402091
mitochondria	0.000402091
Oleiphilaceae	0.000402091
Phormidiaceae	0.000402091
Rhodospirillaceae	0.000402091
Saccharospirillaceae	0.000402091
Streptococcaceae	0.000402091
wb1_P06	0.000402091

## Sheet: TableS6
Table S6. Average relative abundance of the families present in the predated corals at Ti for the mesocosm experiment
Family	Average relative abundance	Colonne1
Hahellaceae	0.216095	proteo
[Amoebophilaceae]	0.175082	bacterio
	0.131656
Rivulariaceae	0.0971911	cyano
Rhodobacteraceae	0.0946062	proteo
[Acidaminobacteraceae]	0.0580734	firmicutes
Vibrionaceae	0.0289505	proteo
Phormidiaceae	0.0189557	cyano
Rhodospirillaceae	0.0184387	proteo
Phyllobacteriaceae	0.0144753	proteo
Sphingomonadaceae	0.0134413	proteo
Paenibacillaceae	0.013269	firmicutes
Hyphomicrobiaceae	0.0115458	proteo
Moraxellaceae	0.0101672	proteo
Flavobacteriaceae	0.00965018
Hyphomonadaceae	0.00913321
Alteromonadaceae	0.00603136
Pseudomonadaceae	0.00413579
Flammeovirgaceae	0.00344649
Desulfovibrionaceae	0.00327417
[Marinicellaceae]	0.00310184
Verrucomicrobiaceae	0.00292952
Pirellulaceae	0.00258487
Campylobacteraceae	0.00241255
Erythrobacteraceae	0.00241255
Pseudanabaenaceae	0.00241255
Pasteurellaceae	0.00224022
[Pelagicoccaceae]	0.0020679
OM60	0.00189557
Ferrimonadaceae	0.00172325
Pseudoalteromonadaceae	0.00155092
wb1_P06	0.00155092
Cohaesibacteraceae	0.0013786
Colwelliaceae	0.0013786
Shewanellaceae	0.0013786
Bacteriovoracaceae	0.00120627
Corynebacteriaceae	0.00120627
Coxiellaceae	0.00120627
Cytophagaceae	0.00120627
Oceanospirillaceae	0.00103395
Piscirickettsiaceae	0.00103395
Idiomarinaceae	0.000861623
Nannocystaceae	0.000861623
Phycisphaeraceae	0.000861623
Spirochaetaceae	0.000861623
Thiotrichaceae	0.000861623
Trueperaceae	0.000861623
Cenarchaeaceae	0.000689299
Desulfobulbaceae	0.000689299
Francisellaceae	0.000689299
Methylobacteriaceae	0.000689299
Xenococcaceae	0.000689299
Ardenscatenaceae	0.000516974
HTCC2089	0.000516974
Nostocaceae	0.000516974
Staphylococcaceae	0.000516974
Xanthomonadaceae	0.000516974
Aurantimonadaceae	0.000344649
Helicobacteraceae	0.000344649
Leptospiraceae	0.000344649
Saprospiraceae	0.000344649
Synechococcaceae	0.000344649
GZKB119	0.000172325
Marinilabiaceae	0.000172325
Neisseriaceae	0.000172325
Turicibacteraceae	0.000172325

## Sheet: TableS7
Table S7. Average relative abundance of families present in predated corals at Tf
Family	Average relative abundance
Unassigned family	0.24415
Rhodobacteraceae	0.13655
Hahellaceae	0.122075
Pseudoalteromonadaceae	0.110012
Verrucomicrobiaceae	0.0591074
Alteromonadaceae	0.0552473
Flavobacteriaceae	0.038842
Vibrionaceae	0.0386007
Oceanospirillaceae	0.0320869
Colwelliaceae	0.0253317
Lentisphaeraceae	0.0243667
Francisellaceae	0.0161641
Paenibacillaceae	0.0137515
[Amoebophilaceae]	0.00868516
Cryomorphaceae	0.00699638
Saprospiraceae	0.00699638
Synechococcaceae	0.00579011
Flammeovirgaceae	0.00410133
Bacteriovoracaceae	0.00386007
Pseudomonadaceae	0.00386007
Campylobacteraceae	0.00361882
Hyphomonadaceae	0.00361882
Marinilabiaceae	0.00289505
Oleiphilaceae	0.00289505
[Acidaminobacteraceae]	0.0026538
Piscirickettsiaceae	0.00241255
Cenarchaeaceae	0.00217129
Spirochaetaceae	0.00217129
A4b	0.00193004
Hyphomicrobiaceae	0.00193004
Moraxellaceae	0.00193004
HTCC2089	0.00168878
Kiloniellaceae	0.00168878
Rhodospirillaceae	0.00168878
[Marinicellaceae]	0.00144753
Erythrobacteraceae	0.00120627
OM60	0.00120627
Actinosynnemataceae	0.000965018
NB1-i	0.000723764
Planctomycetaceae	0.000723764
wb1_P06	0.000723764
Cohaesibacteraceae	0.000482509
Desulfarculaceae	0.000482509
Desulfobulbaceae	0.000482509
Sphingomonadaceae	0.000482509
Staphylococcaceae	0.000482509
Halomonadaceae	0.000241255
Helicobacteraceae	0.000241255
Pirellulaceae	0.000241255

## Sheet: TableS8
Table S8. Results of the permutational ANOVA on the bacterial assemblages according to the sample type assessed for field experiment including or not water samples
PERMANOVA
	Df	SumsOfSqs	MeanSqs	F.Model	R2	Pr(>F)
SampleType	2	2.8766	1.43832	10.326	0.49582	0.001
Residuals	21	2.9251	0.13929	0.50418
Total	23	5.8018	1
PERMANOVA including water samples
	Df	SumsOfSqs	MeanSqs	F.Model	R2	Pr(>F)
SampleType	3	5.2878	1.76261	10.547	0.56867	0.001
Residuals	24	4.0107	0.16711	0.43133
Total	27	9.2985	1

## Sheet: TableS9
Table S9. Results of pair-wise tests on the effect of the sample type on the bacterial assemblages for the field experiment.
Pair-wise Adonis
	F.Model	R2	P-value	P-adjusted
Fish - Unbitten	16.1322	0.518184	0.001	0.0015
Fish - Bitten	7.56724	0.350867	0.001	0.0015
Unbitten - Bitten	3.0553	0.190299	0.011	0.01
Pair-wise Adonis including water samples
	F.Model	R2	P-value	P-adjusted
Fish - Unbitten	14.3254	0.488498	0.001	0.002
Fish - Bitten	7.92862	0.361565	0.001	0.002
Fish - Water	5.04983	0.314635	0.001	0.002
Bitten - Unbitten	3.0553	0.190299	0.003	0.003
Unbitten -Water	48.92	0.830278	0.003	0.003
Bitten -Water	14.0612	0.609734	0.002	0.003

[truncated: 18 more sheets: TableS10, TableS11, TableS12, TableS13, TableS14, TableS15, TableS16, TableS17, TableS18, TableS19, TableS20, TableS21, TableS22, TableS23, TableS24, TableS25, TableS26, TableS27]
